# Supplementary material for: Association between Handgrip Strength and Cognitive Function in Older Adults: Korean Longitudinal Study of Aging (2006–2018)
Source: MDPI journal article supplement (doi:10.3390/ijerph19031048), 2022-01-18
Supplement: s1 [file s1]

## **Appendix**

### **Association between handgrip strength and cognitive function in older adults: Korean Longitudinal Study of Aging (2006–2018)**

Corresponding author: [wchung@yuhs.ac](mailto:wchung@yuhs.ac)

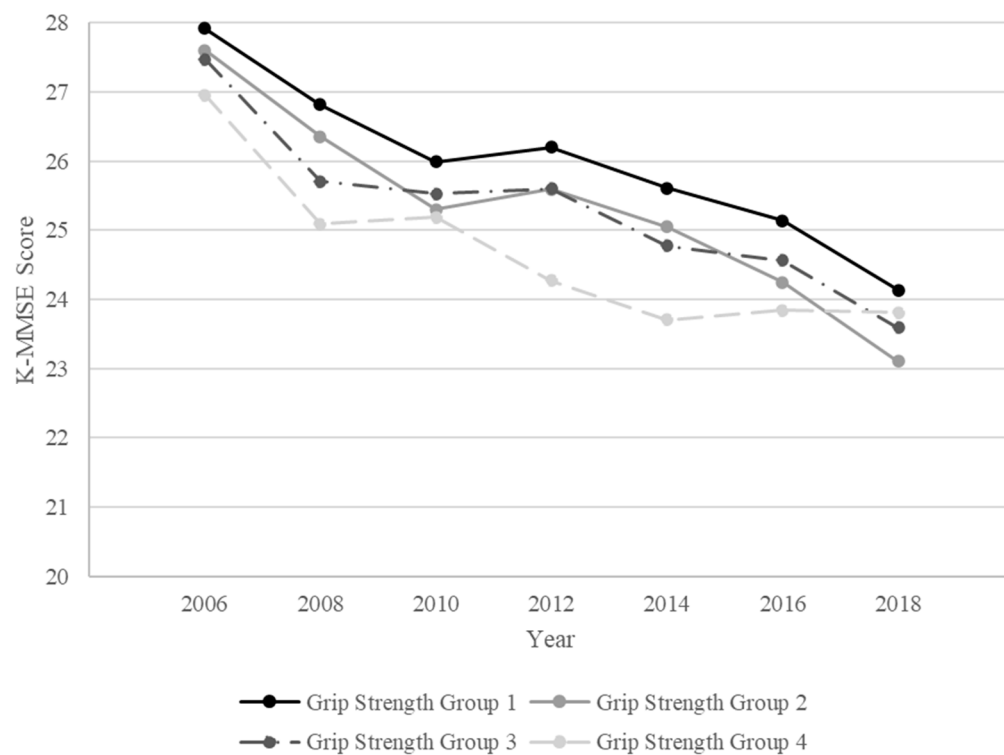

**Supplementary Figure S1.** Changes in mean K-MMSE scores of males according to handgrip strength groups during the seven waves of KLoSA. K-MMSE: Korean Mini-Mental State Examination, KLoSA: Korean Longitudinal Study of Aging.

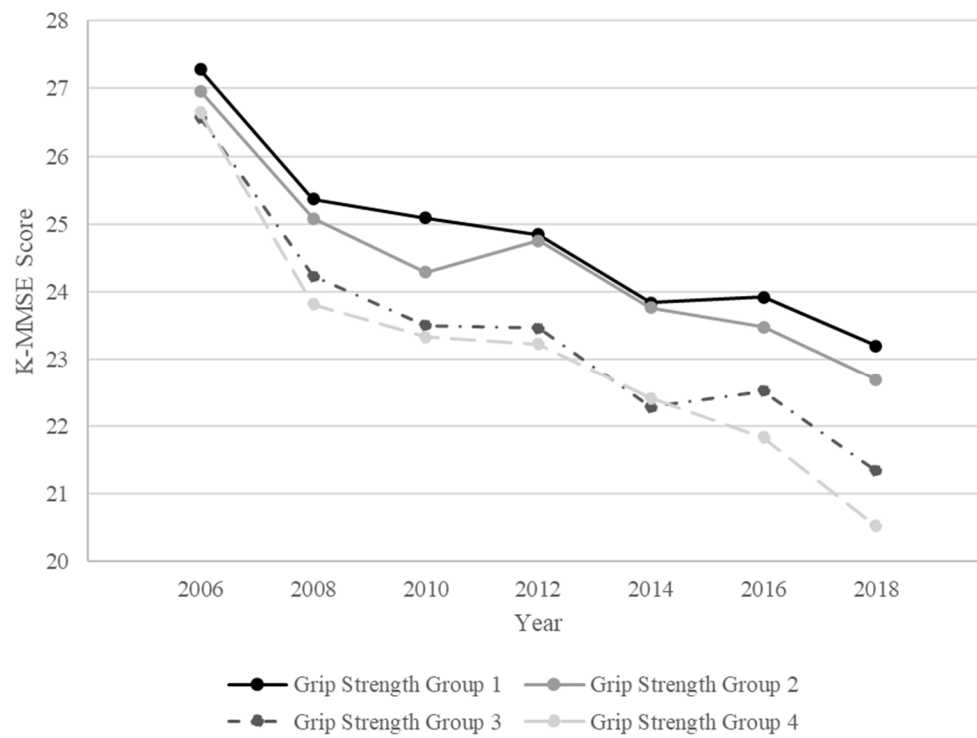

**Supplementary Figure S2.** Changes in mean K-MMSE scores of females according to handgrip strength groups during the seven waves of KLoSA. K-MMSE: Korean Mini-Mental State Examination, KLoSA: Korean Longitudinal Study of Aging.
